# Supplementary material
Source: ML conference proceedings conference paper supplement (https://openaccess.thecvf.com/content/WACV2025/html/Lin_Semantic_Prompt_Learning_WACV_2025_paper.html)
Supplement: Supplementary file 1 [file Lin_Semantic_Prompt_Learning_WACV_2025_supplemental.pdf]

# Semantic Prompt Learning for Weakly-Supervised Semantic Segmentation

## Supplementary Material

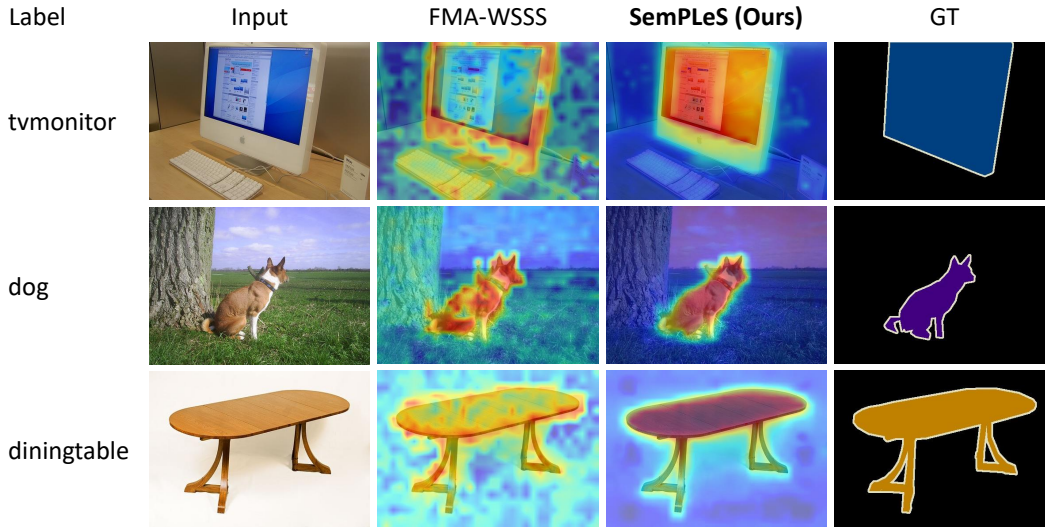

Figure 7. Qualitative results of CAMs. “GT” denotes the ground truth masks.

| $K$  | 1    | 5    | 10   | 30   | 50   |
|------|------|------|------|------|------|
| mIoU | 68.2 | 68.4 | 68.5 | 68.7 | 68.4 |

Table 6. Quantitative analysis of the number of prompts.

| $\lambda$ | 0    | 0.01 | 0.02 | 0.05 | 0.1  |
|-----------|------|------|------|------|------|
| mIoU      | 67.6 | 68.3 | 68.4 | 68.7 | 67.8 |

Table 7. Quantitative analysis of loss weight.

**Qualitative results:** In Figure 7, we see that our proposed SemPLES framework results in more accurate CAMs which properly capture the whole target object and are well-aligned with the ground truth masks, demonstrating the effectiveness of our method.

## 6. More Experiments

**The number of prompts:** In Table 6, we provide analysis on the number of prompts  $K$ , and we see that the mIoU would stop increasing at  $K = 50$  due to possible overfitting. Hence, we set  $K = 30$  by default.

**Loss weight:** In Table 7, we provide analysis on the refinement loss weight  $\lambda$ . When varying  $\lambda$ , the mIoU gradually increases from 67.6% to 68.7% when  $\lambda = 0.05$ , and then drops to 67.8% when  $\lambda = 0.1$ . Hence, we set  $\lambda = 0.05$  by default.
